# Supplementary material
Source: PubMed Central journal article supplement (PMC2975032)

## **Supplemental Information**

**Laser microsurgery provides evidence for merotelic kinetochore attachments in fission yeast cells lacking Pcs1 or Clr4.**

Cornelia Rumpf, Lubos Cipak, Alexander Schleiffer, Karl Mechtler, Alison Pidoux, Iva M. Tolić-Nørrelykke, and Juraj Gregan

## Supplemental Figure Legends

**Figure S1.** Mde4 and Pcs1 are phosphorylated during mitosis.

(A) List of proteins identified by mass spectrometry co-purifying with *S. pombe* Pcs1-TAP and Mde4-TAP isolated from *nda3-KM311*-arrested cells (JG15058 and JG15137, respectively) or cycling cells (JG15137). Only proteins identified with more than two peptides are included. Proteins found in other unrelated purifications are omitted from this table.

(B) Mde4 and Pcs1 phosphorylation sites identified by mass spectrometry. The identified phosphorylated residues are indicated in red. Sequence coverage is highlighted in yellow.

**Figure S2.** Sensitivity of cells expressing Cdc2-as to 1-NM-PP1. Serial dilutions of wild type cells (JG15123) or *cdc2Δ* cells expressing the analog-sensitive Cdc2-as (Cdc2-F84G) (JG15125) were spotted on YES plates containing or lacking 5  $\mu$ M 1-NM-PP1 and grown for 2 days at 32°C.

**Figure S3.** Interdependent localization of Pcs1 and Mde4.

(A) Wild-type cells expressing Pcs1-GFP and Mis6-HA (JG15031), or Mde4-GFP and Mis6-HA (JG15033), *mde4Δ* mutant cells expressing Pcs1-GFP and Mis6-HA (JG15383), and *pcs1Δ* mutant cells expressing Mde4-GFP and Mis6-HA (JG15366) were fixed and stained with antibodies against HA and GFP. Nuclei were visualized by Hoechst staining.

(B) Cells as described in Figure S3A were analyzed by Western blot analysis using anti-tubulin and anti-GFP antibodies.

## The genotypes of *S. pombe* strains used in this study

| Strains | Genotype                                                                                    |
|---------|---------------------------------------------------------------------------------------------|
| JG15031 | <i>h+ nda3-311 mis6-HA-leu2 pcs1-GFP-leu2 leu1-32</i>                                       |
| JG12013 | <i>h+ nda3-311 leu1-32 ura4-D18 his2</i>                                                    |
| JG14985 | <i>h+ nda3-311 pcs1-GFP-leu2 leu1-32 ura4-D18 his2</i>                                      |
| JG12239 | <i>h- nda3-311 sgo2-GFP-Kan<sup>R</sup> ura4</i>                                            |
| JG15033 | <i>h+ nda3-311 mis6-HA-leu2 leu1-32 mde4-GFP-Kan<sup>R</sup></i>                            |
| JG15356 | <i>h? nda3-311 mis6-HA mde4-GFP cdc2::ClonNat<sup>R</sup> cdc2-as-Hph<sup>R</sup></i>       |
| JG15161 | <i>h- mCherry-atb2-hph<sup>R</sup> nuf2-GFP-Kan<sup>R</sup> pcs1::CloneNat<sup>R</sup></i>  |
| JG15351 | <i>h- clr4::LEU2+ Nuf2-GFP-Kan<sup>R</sup> mCherry-atb2-hph<sup>R</sup> leu1-32</i>         |
| JG15058 | <i>h? nda3-311 pcs1-HA-TAP-Kan<sup>R</sup></i>                                              |
| JG15137 | <i>h+ nda3-311 leu1-32 ura4-D18 his2 mde4-Tap-Kan<sup>R</sup></i>                           |
| JG15414 | <i>h+ lys1 his7 leu1 ura4 ade6-210 pcs1::ClonNat<sup>R</sup> pcs1-wt-Hph<sup>R</sup></i>    |
| JG14821 | <i>h+ lys1 his7 leu1 ura4 ade6-210 pcs1::ClonNat<sup>R</sup></i>                            |
| JG15549 | <i>h+ lys1 his7 leu1 ura4 ade6-210 pcs1::ClonNat<sup>R</sup> pcs1-L140A-Hph<sup>R</sup></i> |
| JG15550 | <i>h+ lys1 his7 leu1 ura4 ade6-210 pcs1::ClonNat<sup>R</sup> pcs1-F154A-Hph<sup>R</sup></i> |
| JG15551 | <i>h+ lys1 his7 leu1 ura4 ade6-210 pcs1::ClonNat<sup>R</sup> pcs1-F154D-Hph<sup>R</sup></i> |
| JG15552 | <i>h+ lys1 his7 leu1 ura4 ade6-210 pcs1::ClonNat<sup>R</sup> pcs1-F212A-Hph<sup>R</sup></i> |
| JG15553 | <i>h+ lys1 his7 leu1 ura4 ade6-210 pcs1::ClonNat<sup>R</sup> pcs1-F212D-Hph<sup>R</sup></i> |
| JG15383 | <i>h+ nda3-311 mis6-HA-leu2 pcs1-GFP-LEU2 leu1-32 mde4::Kan<sup>R</sup></i>                 |
| JG15366 | <i>h+ nda3-311 mis6-HA-leu2 mde4-GFP-Kan<sup>R</sup> leu1-32 pcs1::CloneNat<sup>R</sup></i> |
| JG15123 | <i>h? cdc2+</i>                                                                             |
| JG15125 | <i>h- cdc2::ClonNat<sup>R</sup> cdc2-as-Hph<sup>R</sup></i>                                 |

# Figure S1

## A

| List of proteins identified by mass spectrometry co-purifying with Pcs1-TAP from <i>nda3</i> -arrested <i>S. pombe</i> cells. |                                     |                           |
|-------------------------------------------------------------------------------------------------------------------------------|-------------------------------------|---------------------------|
| Protein (GeneInfo identifier)                                                                                                 | Description                         | Number of unique peptides |
| 1 68005983                                                                                                                    | Chromosome segregation protein Pcs1 | 22                        |
| 2 19112875                                                                                                                    | Sequence orphan Mde4                | 18                        |

  

| List of proteins identified by mass spectrometry co-purifying with Mde4-TAP from cycling <i>S. pombe</i> cells. |                                                          |                           |
|-----------------------------------------------------------------------------------------------------------------|----------------------------------------------------------|---------------------------|
| Protein (GeneInfo identifier)                                                                                   | Description                                              | Number of unique peptides |
| 1 19112875                                                                                                      | Sequence orphan Mde4                                     | 56                        |
| 2 19113336                                                                                                      | Nucleolar protein Dna1                                   | 84                        |
| 3 68005983                                                                                                      | Chromosome segregation protein Pcs1                      | 51                        |
| 17 19115145                                                                                                     | Karyopherin Kap95                                        | 6                         |
| 18 19114970                                                                                                     | Ribosomal-ubiquitin fusion protein Ubi5                  | 5                         |
| 24 19112476                                                                                                     | Ataxin-2 homolog                                         | 4                         |
| 37 19115509                                                                                                     | TM22 inner membrane protein import complex subunit Tim13 | 2                         |
| 40 19113475                                                                                                     | Human LYHRT homolog                                      | 2                         |
| 46 19114125                                                                                                     | Nucleoporin Nup124                                       | 2                         |
| 52 1136783                                                                                                      | Elongation factor 1 alpha-A                              | 2                         |
| 53 63054532                                                                                                     | ATP-dependent DNA ligase Cde17                           | 2                         |

  

| List of proteins identified by mass spectrometry co-purifying with Mde4-TAP from <i>nda3</i> -arrested <i>S. pombe</i> cells. |                                                                   |                           |
|-------------------------------------------------------------------------------------------------------------------------------|-------------------------------------------------------------------|---------------------------|
| Protein (GeneInfo identifier)                                                                                                 | Description                                                       | Number of unique peptides |
| 1 19112875                                                                                                                    | Sequence orphan Mde4                                              | 25                        |
| 2 19113336                                                                                                                    | Nucleolar protein Dna1                                            | 23                        |
| 4 19075845                                                                                                                    | RNA polymerase I upstream activation factor complex subunit Spp27 | 11                        |
| 10 19112198                                                                                                                   | Chaperonin-containing T-complex theta subunit Cet8                | 9                         |
| 11 19112741                                                                                                                   | Chaperonin-containing T-complex alpha subunit Cet1                | 9                         |
| 12 68005983                                                                                                                   | Chromosome segregation protein Pcs1                               | 8                         |
| 17 19112476                                                                                                                   | Ataxin-2 homolog                                                  | 7                         |
| 19 19111947                                                                                                                   | Chaperonin-containing T-complex delta subunit Cet4                | 7                         |
| 22 19114645                                                                                                                   | Mitotic spindle checkpoint protein Dna1                           | 6                         |
| 23 19112602                                                                                                                   | Chaperonin-containing T-complex gamma subunit Cet3                | 6                         |
| 33 19113147                                                                                                                   | Chaperonin-containing T-complex eta subunit Cet7                  | 5                         |
| 48 19115145                                                                                                                   | Karyopherin Kap95                                                 | 4                         |
| 49 19112010                                                                                                                   | Vta27 family protein                                              | 4                         |
| 52 19114189                                                                                                                   | Chaperonin-containing T-complex epsilon subunit Cet5              | 3                         |
| 65 19076049                                                                                                                   | Acetyl-CoA-ligase                                                 | 3                         |
| 70 19113371                                                                                                                   | Sequence orphan                                                   | 3                         |
| 73 19114554                                                                                                                   | Serine/threonine protein kinase Cka1                              | 2                         |
| 75 19115509                                                                                                                   | TM22 inner membrane protein import complex subunit Tim13          | 2                         |
| 76 19114018                                                                                                                   | U3 snoRNP protein Nop58                                           | 2                         |
| 80 19112161                                                                                                                   | Chaperonin-containing T-complex zeta subunit Cet6                 | 2                         |
| 82 19113929                                                                                                                   | Chaperonin-containing T-complex beta subunit Cet2                 | 2                         |
| 85 1136783                                                                                                                    | Elongation factor 1 alpha-A                                       | 2                         |
| 87 19076061                                                                                                                   | Ribosome biogenesis protein Nra2                                  | 2                         |
| 88 12000355                                                                                                                   | Single-stranded TG1-3 binding protein                             | 2                         |
| 90 19112160                                                                                                                   | U3 snoRNP protein Nop56                                           | 2                         |
| 91 19112358                                                                                                                   | Histone H4 h4.2                                                   | 2                         |

## B

### Mde4 (*nda3*-arrest)

### Mde4 (cycling cells)

```

MSTISTSDS KLDNLGLSVT SRRNQILFYL SKALNLAHLL RSDSLQKSF L DALKQSATDS ELLHKNLDEI
KFLQNEKLN EKLLEQE QNE ANDYRLKVER LEHKISDYVQ EINSLSQLQ IQKSNPEKHE DAVSQNRLRG
SLD TVSSPSK THKANKDEKA TRLHLIIANL KKALK EKDAE VLNLQSHVSS KESELDRFKI
VRLQVLESKL ATQDRKLRM Q KKSTERKSL L VSPRVSPK L TRQPNATSGS PLSVTPFLQK TSTSIGLSSS PPQSSPSAQ S
TSTSIGLSSS SQPFPSRDKYP HSMTVSPSNA RYLK KHLDDT IPSNVSDINH NDHLKIPQSP
SSLSPSKIP I RKRRKLDTV SNCEFTEDS ESSFLETIQ PTKSTLRRSI
K
1 MSTISTSDS KLDNLGLSVT SRRNQILFYL SKALNLAHLL RSDSLQKSF L
51 DALKQSATDS ELLHKNLDEI KFLQNEKLN EKLLEQE QNE ANDYRLKVER
101 LEHKISDYVQ EINSLSQLQ IQKSNPEKHE DAVSQNRLRG SLDTVSSPSK
151 THKANKDEKA TRLHLIIANL KKALK EKDAE VLNLQSHVSS KESELDRFKI
201 KLETEESNWK VRLQVLESKL ATQDRKLRM Q KKSTERKSL L VSPRVSPK L
251 FSPSKQAIMG TRQPNATSGS PLSVTPFLQK TSTSIGLSSS PPQSSPSAQ S
301 SQPFPSRDKYP HSMTVSPSNA RYLK KHLDDT IPSNVSDINH NDHLKIPQSP
351 SSLSPSKIP I RKRRKLDTV SNCEFTEDS ESSFLETIQ PTKSTLRRSI
401 SPLKKRND E I NELKKGFTMK K

```

```

MSTISTSDS KLDNLGLSVT SRRNQILFYL SKALNLAHLL RSDSLQKSF L DALKQSATDS
ELLHKNLDEI KFLQNEKLN EKLLEQE QNE ANDYRLKVER LEHKISDYVQ EINSLSQLQ
IQKSNPEKHE DAVSQNRLRG SLDTVSSPSK THKANKDEKA TRLHLIIANL KKALK EKDAE
VLNLQSHVSS KESELDRFKI KLETEESNWK VRLQVLESKL ATQDRKLRM Q KKSTERKSL L
VSPRVSPK L FSPSKQAIMG TRQPNATSGS PLSVTPFLQK TSTSIGLSSS PPQSSPSAQ S
SQPFPSRDKYP HSMTVSPSNA RYLK KHLDDT IPSNVSDINH NDHLKIPQSP
RKRRKLDTV SNCEFTEDS ESSFLETIQ PTKSTLRRSI SPLKKRND E I NELKKGFTMK
K

```

```

1 MSTISTSDS KLDNLGLSVT SRRNQILFYL SKALNLAHLL RSDSLQKSF L
51 DALKQSATDS ELLHKNLDEI KFLQNEKLN EKLLEQE QNE ANDYRLKVER
101 LEHKISDYVQ EINSLSQLQ IQKSNPEKHE DAVSQNRLRG SLDTVSSPSK
151 THKANKDEKA TRLHLIIANL KKALK EKDAE VLNLQSHVSS KESELDRFKI
201 KLETEESNWK VRLQVLESKL ATQDRKLRM Q KKSTERKSL L VSPRVSPK L
251 FSPSKQAIMG TRQPNATSGS PLSVTPFLQK TSTSIGLSSS PPQSSPSAQ S
301 SQPFPSRDKYP HSMTVSPSNA RYLK KHLDDT IPSNVSDINH NDHLKIPQSP
351 SSLSPSKIP I RKRRKLDTV SNCEFTEDS ESSFLETIQ PTKSTLRRSI
401 SPLKKRND E I NELKKGFTMK K

```

### Pcs1 (*nda3*-arrest)

### Pcs1 (cycling cells)

```

MHSTQDFVNN EDQDAYSVRE NENELHINNS GMSSELNKKLQ LPNVELSTLS HTQEQEFNEL NKLIRKINEL
QEFYLLLEDLA KPVTNAGADA DEDTIVKDLK KELENEKKAN HSLKNELLKT REQIKNYSKI NILIKELFGL
EVADCIED E D GYRFNCKNTG RRG TLEYQLL LDDQNF TFTP RLNVQTDEEL MKHLPDYLL E EIIFTKEQ GK
LFSARLMKAL QD
1 MHSTQDFVNN EDQDAYSVRE NENELHINNS GMSSELNKKLQ LPNVELSTLS
51 HTQEQEFNEL NKLIRKINEL QEFYLLLEDLA KPVTNAGADA DEDTIVKDLK
101 KELENEKKAN HSLKNELLKT REQIKNYSKI NILIKELFGL EVADCIED E D
151 GYRFNCKNTG RRG TLEYQLL LDDQNF TFTP RLNVQTDEEL MKHLPDYLL E
201 EIIFTKEQ GK LFSARLMKAL QD

```

```

MHSTQDFVNN EDQDAYSVRE NENELHINNS GMSSELNKKLQ LPNVELSTLS HTQEQEFNEL
NKLIRKINEL QEFYLLLEDLA KPVTNAGADA DEDTIVKDLK KELENEKKAN HSLKNELLKT
REQIKNYSKI NILIKELFGL EVADCIED E D GYRFNCKNTG RRG TLEYQLL LDDQNF TFTP
RLNVQTDEEL MKHLPDYLL E EIIFTKEQ GK LFSARLMKAL QD
1 MHSTQDFVNN EDQDAYSVRE NENELHINNS GMSSELNKKLQ LPNVELSTLS
51 HTQEQEFNEL NKLIRKINEL QEFYLLLEDLA KPVTNAGADA DEDTIVKDLK
101 KELENEKKAN HSLKNELLKT REQIKNYSKI NILIKELFGL EVADCIED E D
151 GYRFNCKNTG RRG TLEYQLL LDDQNF TFTP RLNVQTDEEL MKHLPDYLL E
201 EIIFTKEQ GK LFSARLMKAL QD

```

Figure S2

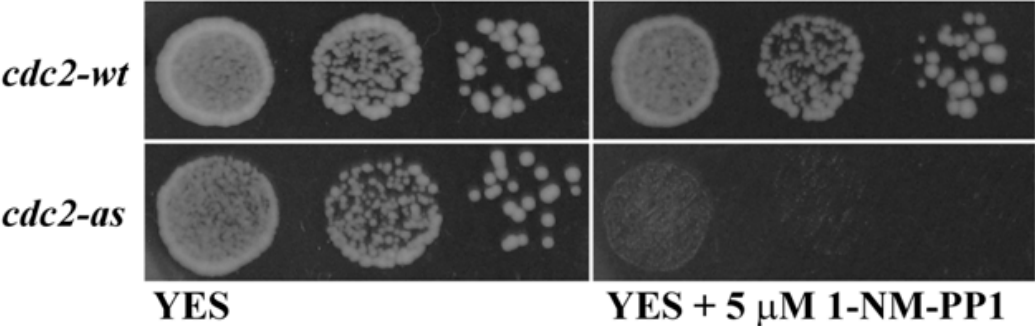

Figure S3

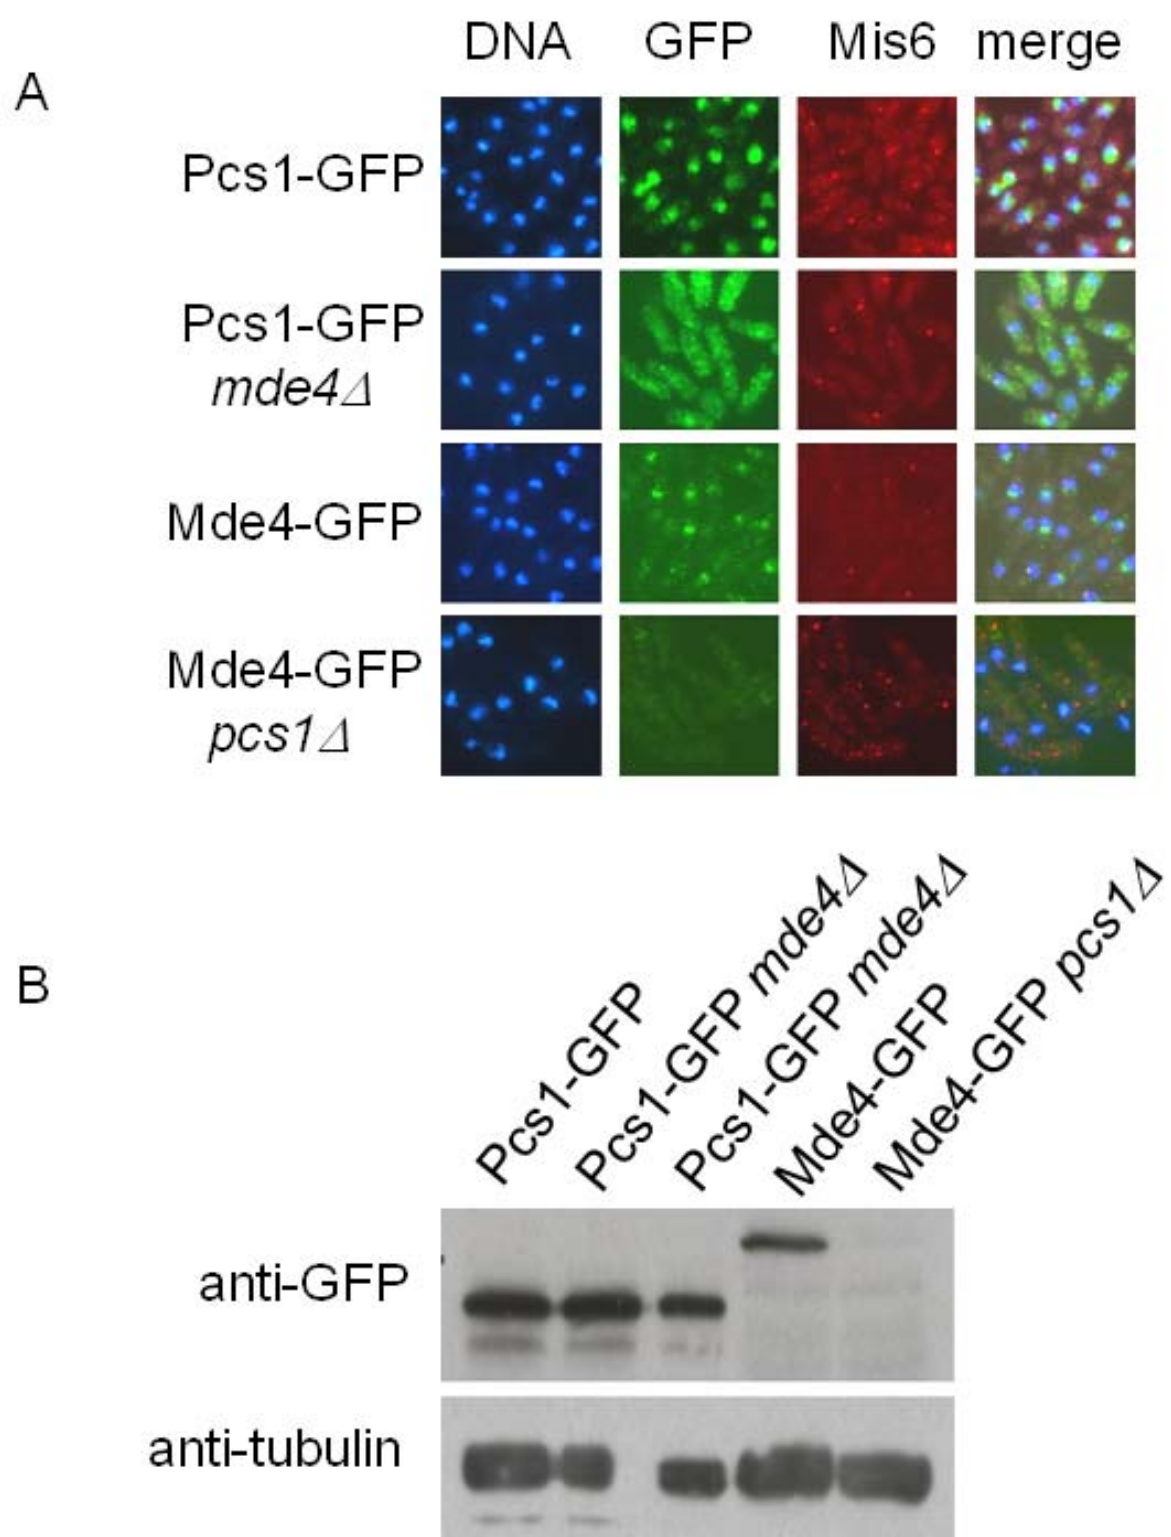

Supplement: NIHMS32246-supplement-1.pdf [file NIHMS32246-supplement-1.pdf]
